# Supplementary material
Source: PubMed Central journal article supplement (PMC6371647)
Supplement: ehp3304.s001.acco.pdf [file ehp3304.s001.acco.pdf]

**Note to readers with disabilities:** *EHP* strives to ensure that all journal content is accessible to all readers. However, some figures and Supplemental Material published in *EHP* articles may not conform to [508 standards](#) due to the complexity of the information being presented. If you need assistance accessing journal content, please contact [ehp508@niehs.nih.gov](mailto:ehp508@niehs.nih.gov). Our staff will work with you to assess and meet your accessibility needs within 3 working days.

### **Supplemental Material**

#### **Long-Term Exposure to Ambient Fine Particulate Matter and Chronic Kidney Disease: A Cohort Study**

Ta-Chien Chan, Zilong Zhang, Bo-Cheng Lin, Changqing Lin, Han-Bing Deng, Yuan Chieh Chuang, Jimmy W.M. Chan, Wun Kai Jiang, Tony Tam, Ly-yun Chang, Gerard Hoek, Alexis K.H. Lau, and Xiang Qian Lao

#### **Table of Contents**

**Table S1.** Characteristics of participants in the study cohort of Taiwanese adults.

**Table S2.** Associations between incident chronic kidney disease and long-term PM<sub>2.5</sub> exposure in Taiwanese adults (eGFR calculated using CKD-Epi equation, N=103,353).

**Figure S1.** Maps of Taiwan showing the residential or business locations of study participants (circles) and spatial distributions of baseline PM<sub>2.5</sub> exposure by year of the study (2001–2011).

Table S1 Characteristics of participants in the study cohort of Taiwanese adults

| Characteristics                      | Participants with eGFR <sup>a</sup> | Participants with Multiple visits <sup>b</sup> | Eligible participants <sup>c</sup> | Eligible participants with follow-up $\geq$ 3 years <sup>d</sup> |
|--------------------------------------|-------------------------------------|------------------------------------------------|------------------------------------|------------------------------------------------------------------|
| Number of participants               | 429,058                             | 159,944                                        | 147,658                            | 100,629                                                          |
| Age (year)                           | 39.3 $\pm$ 13.4                     | 39.0 $\pm$ 12.7                                | 39.1 $\pm$ 11.5                    | 38.9 $\pm$ 11.3                                                  |
| Male                                 | 206,626 (48.2)                      | 79,492 (49.7)                                  | 78,075 (52.9)                      | 52,837 (52.5)                                                    |
| Body mass index (kg/m <sup>2</sup> ) | 23.0 $\pm$ 3.8                      | 22.9 $\pm$ 3.6                                 | 23.0 $\pm$ 3.5                     | 22.9 $\pm$ 3.5                                                   |
| Systolic blood pressure (mmHg)       | 117.9 $\pm$ 17.7                    | 117.4 $\pm$ 17.1                               | 117.3 $\pm$ 16.6                   | 117.0 $\pm$ 16.4                                                 |
| Fasting glucose (mg/dL)              | 99.6 $\pm$ 21.4                     | 98.7 $\pm$ 19.3                                | 98.5 $\pm$ 18.4                    | 98.1 $\pm$ 17.7                                                  |
| Total cholesterol (mg/dL)            | 191.0 $\pm$ 34.1                    | 190.5 $\pm$ 35.4                               | 190.8 $\pm$ 34.9                   | 190.1 $\pm$ 34.6                                                 |
| eGFR (mL/min/1.73m <sup>2</sup> )    | 86.4 $\pm$ 17.6                     | 86.5 $\pm$ 14.7                                | 86.8 $\pm$ 15.0                    | 87.0 $\pm$ 14.9                                                  |
| Self-reported cardiovascular disease | 12,177 (2.8)                        | 3999 (2.5)                                     | 3295 (2.2)                         | 2122 (2.1)                                                       |

Data are presented as mean  $\pm$ SD for continuous variables and number (percentage) for categorical variables. Data are complete for all variables.

<sup>a</sup> Participants with eGFR: participants having serum creatinine measurement for the calculation of eGFR in the period of 2001 to 2014. Those with eGFR  $\geq$  200 mL/min/1.73 m<sup>2</sup> or  $<$  2 mL/min/1.73 m<sup>2</sup> were excluded because the values suggested the measurements were probably incorrect due to occasional technical errors;

<sup>b</sup> Participants with multiple visits: participants having at least two medical visits;

<sup>c</sup> Eligible participants: participants meeting the inclusion criteria: (1) aged 20 years or above; (2) having eGFR  $\geq$  60 mL/min/1.73 m<sup>2</sup> and having no self-reported kidney disease at baseline; (3) having no missing information on key variables (socio-economic status, lifestyle, blood tests and PM<sub>2.5</sub> exposure);

<sup>d</sup> Eligible participants with follow-up  $\geq$  3 years: participants with follow-up period  $\geq$  3 years.

Abbreviations: eGFR, estimated glomerular filtration rate; PM<sub>2.5</sub>, particulate matter with an aerodynamic equivalent diameter less than 2.5  $\mu$ m.

Table S2 Associations between incident chronic kidney disease and long-term PM<sub>2.5</sub> exposure in Taiwanese adults (eGFR calculated using CKD-Epi equation, N=103,353)

| Exposure                                     | Crude Model <sup>a</sup> |          | Adjusted Model 1 <sup>b</sup> |          | Adjusted Model 2 <sup>c</sup> |          | Adjusted Model 3 <sup>d</sup> |          | Adjusted Model 4 <sup>e</sup> |          |
|----------------------------------------------|--------------------------|----------|-------------------------------|----------|-------------------------------|----------|-------------------------------|----------|-------------------------------|----------|
|                                              | HR (95% CI)              | <i>P</i> | HR (95% CI)                   | <i>P</i> | HR (95% CI)                   | <i>P</i> | HR (95% CI)                   | <i>P</i> | HR (95% CI)                   | <i>P</i> |
| 1st quintile (5.8–21.2 µg/m <sup>3</sup> )   | Ref                      | —        | Ref                           | —        | Ref                           | —        | Ref                           | —        | Ref                           | —        |
| 2nd quintile (>21.2–23.3 µg/m <sup>3</sup> ) | 0.96 (0.86,1.08)         | 0.51     | 1.09 (0.97,1.23)              | 0.14     | 1.08 (0.96,1.21)              | 0.20     | 1.12 (1.00,1.26)              | 0.05     | 1.12 (1.00,1.27)              | 0.05     |
| 3rd quintile (>23.3–25.3 µg/m <sup>3</sup> ) | 0.92 (0.82,1.04)         | 0.19     | 1.12 (0.99,1.26)              | 0.07     | 1.11 (0.98,1.25)              | 0.10     | 1.22 (1.08,1.37)              | 0.001    | 1.20 (1.06,1.36)              | 0.003    |
| 4th quintile (>25.3–35.7 µg/m <sup>3</sup> ) | 1.08 (0.96,1.21)         | 0.22     | 1.17 (1.04,1.31)              | 0.01     | 1.12 (1.00,1.27)              | 0.05     | 1.24 (1.10,1.40)              | <0.001   | 1.23 (1.10,1.39)              | 0.001    |
| 5th quintile (>35.7–49.6 µg/m <sup>3</sup> ) | 1.09 (0.97,1.22)         | 0.14     | 1.21 (1.08,1.35)              | 0.001    | 1.20 (1.07,1.34)              | 0.002    | 1.23 (1.01,1.38)              | <0.001   | 1.19 (1.06,1.34)              | 0.002    |
| Trend test                                   | —                        | 0.04     | —                             | 0.001    | —                             | 0.002    | —                             | <0.001   | —                             | 0.001    |
| 10 µg/m <sup>3</sup> increment               | 1.06 (1.01,1.11)         | 0.02     | 1.08 (1.03,1.13)              | 0.002    | 1.07 (1.02,1.12)              | 0.003    | 1.08 (1.03,1.13)              | 0.001    | 1.07 (1.02,1.12)              | 0.008    |

CKD defined as eGFR < 60 mL/min/1.73 m<sup>2</sup>; only participants with follow-up ≥ 3 years are included in data analysis. Covariates were from baseline visits. Data are complete for all variables.

<sup>a</sup> Crude model: PM<sub>2.5</sub>;

<sup>b</sup> Model 1: Crude model + age, sex, educational level, smoking, drinking;

<sup>c</sup> Model 2: Model 1 + BMI, systolic blood pressure, fasting glucose, total cholesterol, self-reported heart disease or stroke;

<sup>d</sup> Model 3: Model 2 + baseline eGFR.

<sup>e</sup> Model 4: Model 3 + urine protein.

Abbreviations: CKD, chronic kidney disease; eGFR, estimated glomerular filtration rate; PM<sub>2.5</sub>, particulate matter with an aerodynamic equivalent diameter less than 2.5 µm.

Figure S1

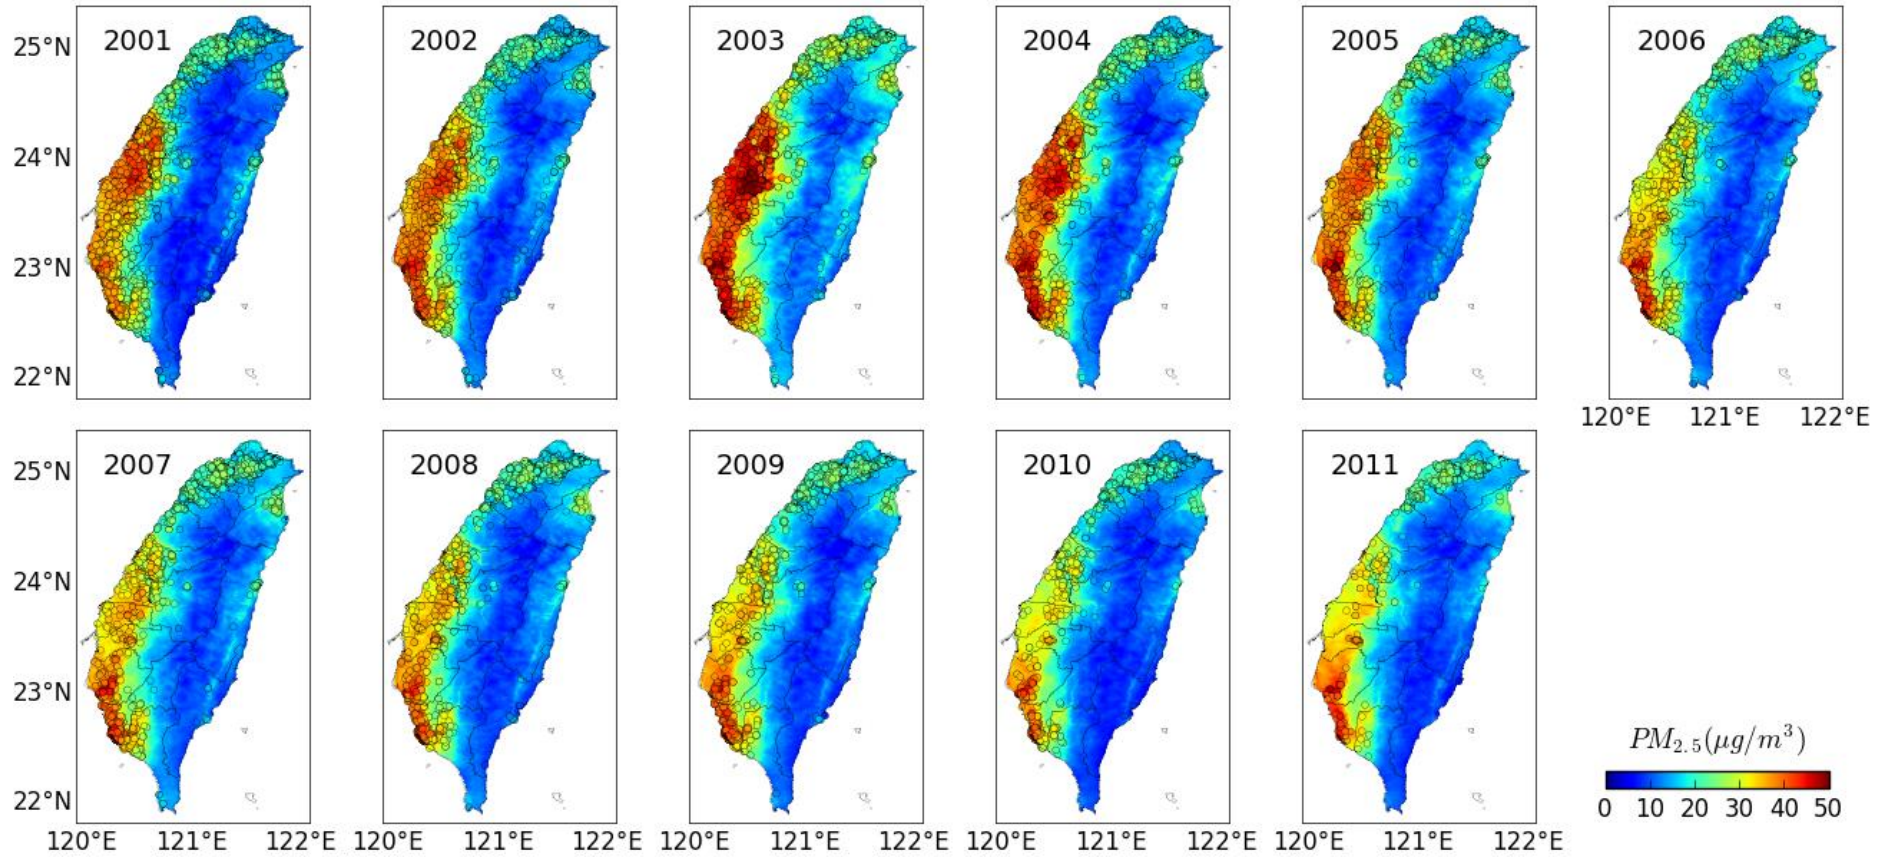

Figure S1. Maps of Taiwan showing the residential or business locations of study participants (circles) and spatial distributions of baseline  $PM_{2.5}$  exposure by year of the study (2001–2011)
