# Supplementary material
Source: PubMed Central journal article supplement (PMC6371647)
Supplement: ehp3304.smcontents.508.pdf [file ehp3304.smcontents.508.pdf]

**Note to readers with disabilities:** *EHP* strives to ensure that all journal content is accessible to all readers. However, some figures and Supplemental Material published in *EHP* articles may not conform to [508 standards](#) due to the complexity of the information being presented. If you need assistance accessing journal content, please contact [ehp508@niehs.nih.gov](mailto:ehp508@niehs.nih.gov). Our staff will work with you to assess and meet your accessibility needs within 3 working days.

### **Supplemental Material**

#### **Long-Term Exposure to Ambient Fine Particulate Matter and Chronic Kidney Disease: A Cohort Study**

Ta-Chien Chan, Zilong Zhang, Bo-Cheng Lin, Changqing Lin, Han-Bing Deng, Yuan Chieh Chuang, Jimmy W.M. Chan, Wun Kai Jiang, Tony Tam, Ly-yun Chang, Gerard Hoek, Alexis K.H. Lau, and Xiang Qian Lao

#### **Table of Contents**

**Table S1.** Characteristics of participants in the study cohort of Taiwanese adults.

**Table S2.** Associations between incident chronic kidney disease and long-term PM<sub>2.5</sub> exposure in Taiwanese adults (eGFR calculated using CKD-Epi equation, N=103,353).

**Figure S1.** Maps of Taiwan showing the residential or business locations of study participants (circles) and spatial distributions of baseline PM<sub>2.5</sub> exposure by year of the study (2001–2011).
